# Supplementary material
Source: PubMed Central journal article supplement (PMC8524819)
Supplement: 12966_2021_1198_MOESM1_ESM.pdf [file 12966_2021_1198_MOESM1_ESM.pdf]

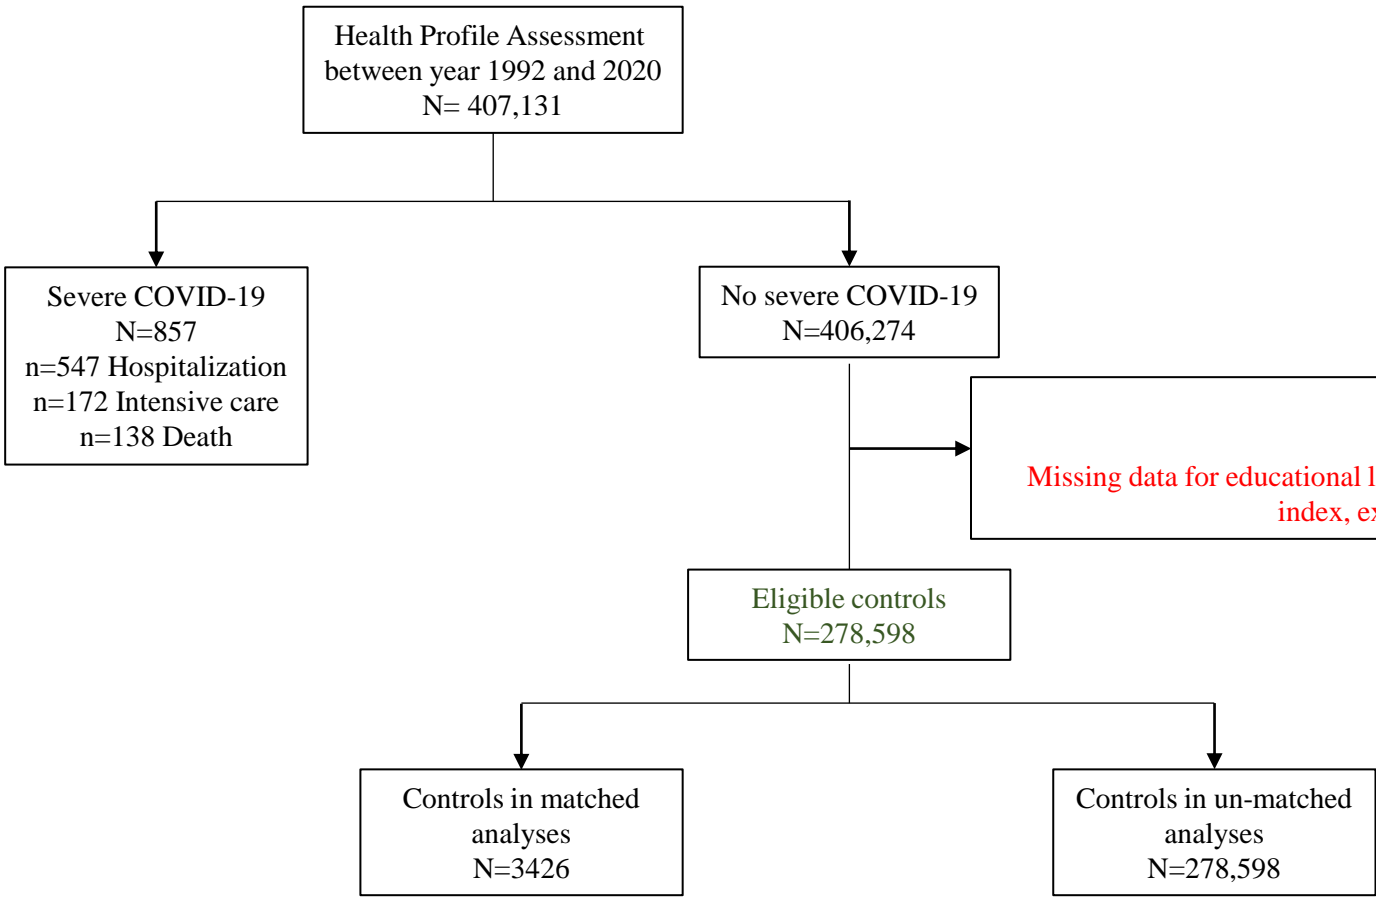

|                                   | Excluded controls<br>N=127,676 | Eligible controls<br>N=278,598 | Differences <sup>a</sup> |
|-----------------------------------|--------------------------------|--------------------------------|--------------------------|
| Women                             | 33%                            | 46%                            | p<0.001                  |
| Age, year                         | 43.0 (11.9)                    | 43.7 (11.6)                    | p<0.001                  |
| EstVO <sub>2</sub> max, ml/min/kg | 35.4 (9.8)                     | 36.1 (10.0)                    | p<0.001                  |
| BMI, kg/m <sup>2</sup>            | 26.1 (4.2)                     | 25.7 (4.1)                     | p<0.001                  |

Data is presented as % or mean (SD)

<sup>a</sup> Potential differences between included and excluded participants were assessed using independent t-test (continuous data) and chi2-test (categorical data)

**Supplement figure 1.** Flowchart of included and excluded participants, with a comparison of central variables
